# Supplementary material for: Magnetic-responsive Pickering emulsions based on MFe2O4 (M = Mn, Fe, Co, Ni, Cu, Zn) for green and efficient oxidation of benzyl alcohol
Source: Royal Society of Chemistry journal article supplement (doi:10.1039/d4gc00554f), 2024-01-01
Supplement: d4gc00554f1.pdf [file d4gc00554f1.pdf]

## Electronic Supplementary Information

### **Magnetic-responsive Pickering Emulsion Based on MFe<sub>2</sub>O<sub>4</sub> (M=Mn, Fe, Co, Ni, Cu, Zn) for Green and Efficient Oxidation of Benzyl Alcohol**

*Yan Wang<sup>a</sup>, Xuan Wang<sup>a</sup>, Yonghao Dong<sup>a</sup> Mingli Peng<sup>a</sup> \*, Lina Guo<sup>a</sup>, Mengyao Cui<sup>a</sup>, Yuan He<sup>a</sup>, Jiabao Yi<sup>b</sup>, Huijun Ma<sup>a</sup>, Huan Zhang<sup>a,c</sup>, Haiming Fan<sup>a</sup>*

a: Key Laboratory of Synthetic and Natural Functional Molecule Chemistry of the Ministry of Education, College of Chemistry and Materials Science & The College of Life Sciences, Northwest University, Xi'an, Shaanxi 710127, People's Republic of China

b: Global Innovative Centre for Advanced Nanomaterials, School of Engineering, The University of Newcastle, Newcastle, NSW 2308, Australia

c: Department of Radiology, Zhuhai People's Hospital (Zhuhai Clinical Medical College of Jinan University), Zhuhai, Guangdong 519000, China

## Electronic Supplementary Information

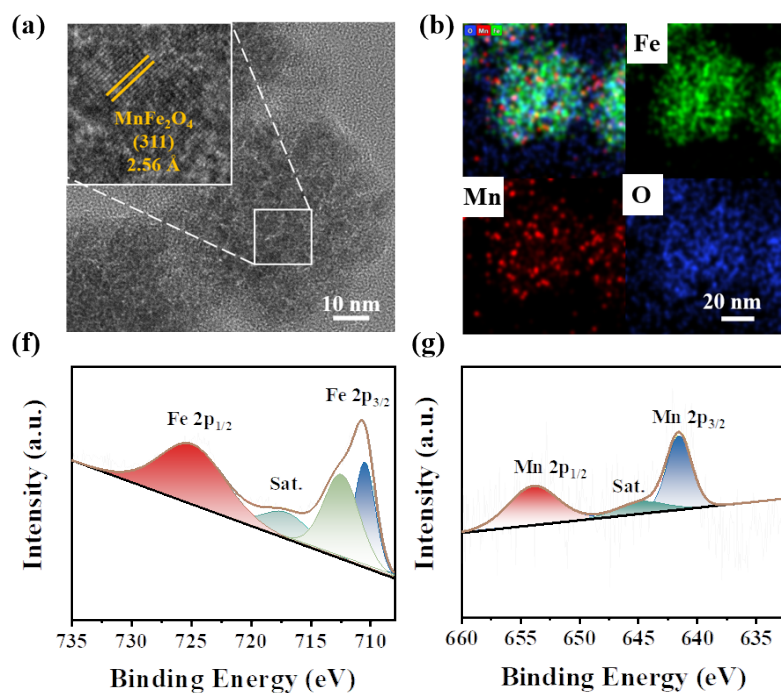

**Fig. S1** Characterization of MnFe<sub>2</sub>O<sub>4</sub> nanoparticles: HRTEM (a), EDS elemental mapping (b) and XPS (c).

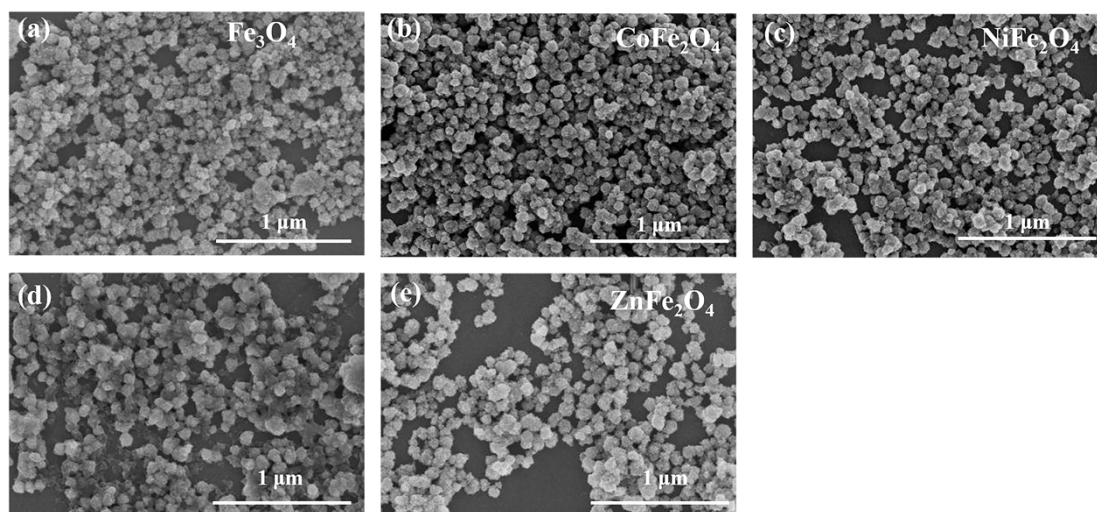

**Fig. S2** SEM images of (a) Fe<sub>3</sub>O<sub>4</sub>, (b) CoFe<sub>2</sub>O<sub>4</sub>, (c) NiFe<sub>2</sub>O<sub>4</sub>, (d) CuFe<sub>2</sub>O<sub>4</sub> and (e) ZnFe<sub>2</sub>O<sub>4</sub>.

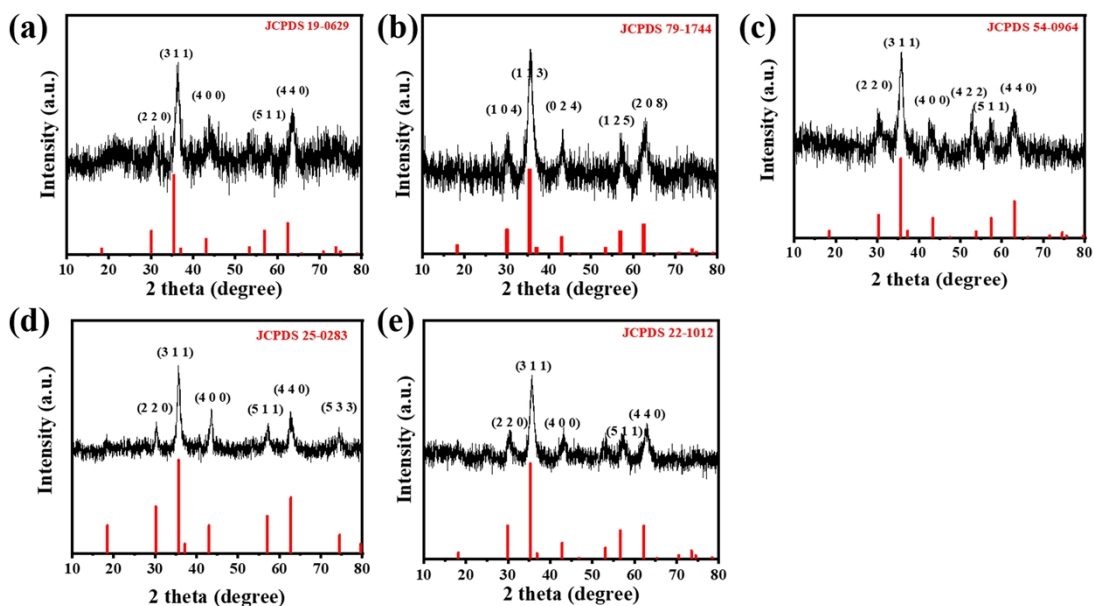

Fig. S3 XRD of (a)  $\text{Fe}_3\text{O}_4$ , (b)  $\text{CoFe}_2\text{O}_4$ , (c)  $\text{NiFe}_2\text{O}_4$ , (d)  $\text{CuFe}_2\text{O}_4$ , and (e)  $\text{ZnFe}_2\text{O}_4$ .

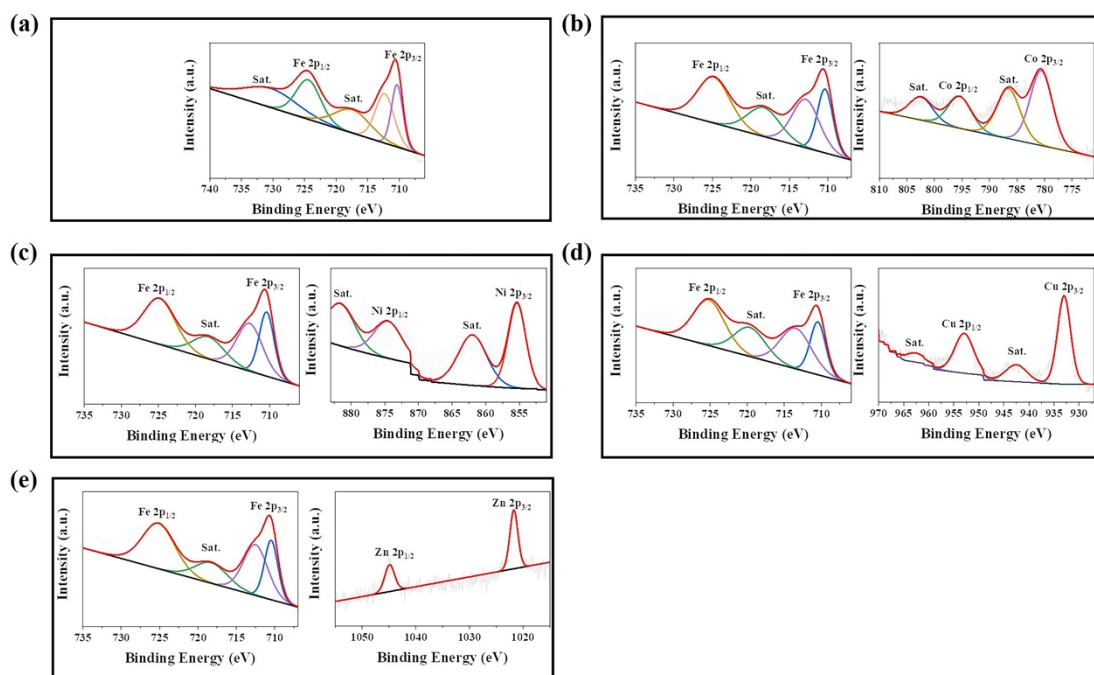

Fig. S4 XPS of (a)  $\text{Fe}_3\text{O}_4$ , (b)  $\text{CoFe}_2\text{O}_4$ , (c)  $\text{NiFe}_2\text{O}_4$ , (d)  $\text{CuFe}_2\text{O}_4$  and (e)  $\text{ZnFe}_2\text{O}_4$ .

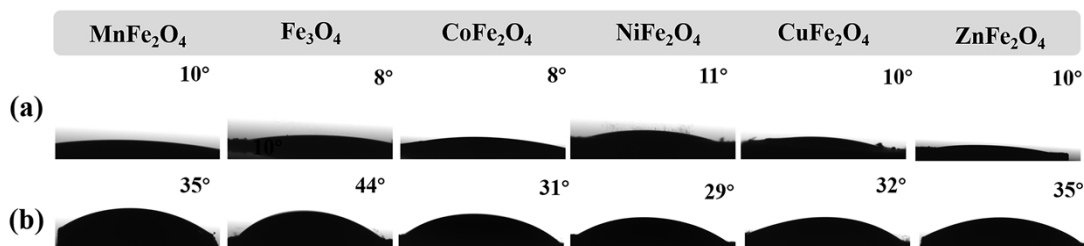

Fig. S5 Water contacts angle (a) and oil contact angle (b) on ferrites nanoparticles slice.

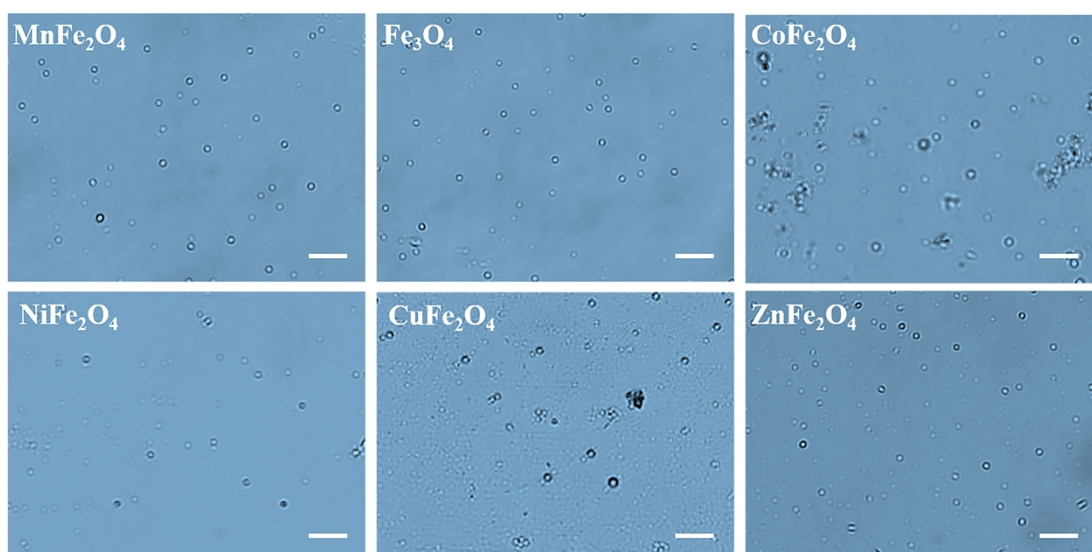

**Fig. S6** Microscope images of Pickering Emulsion stabilized by different ferrites. (Scale bar =10  $\mu\text{m}$ )

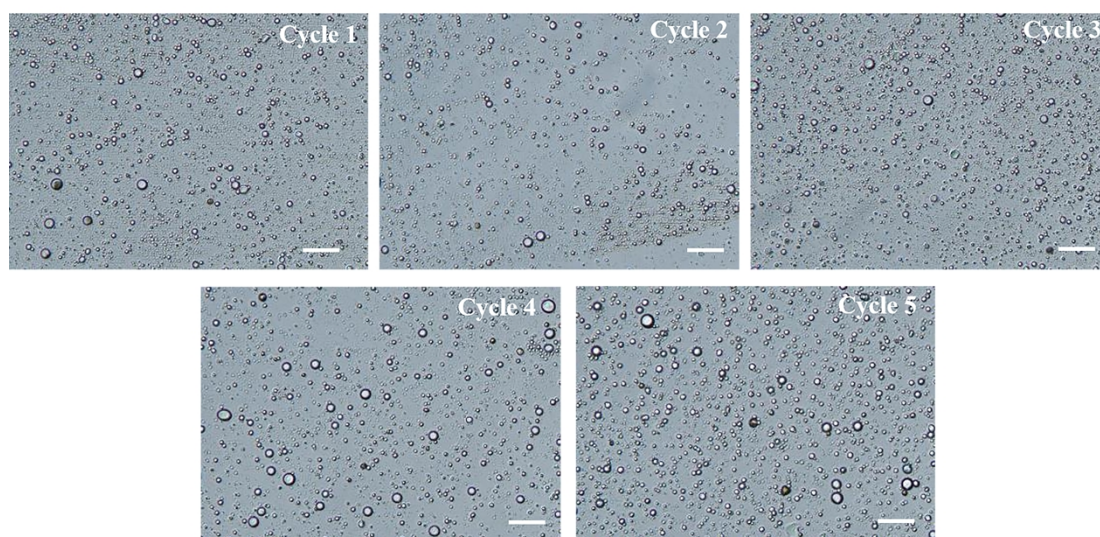

**Fig. S7** Emulsion microscope images with five cycles. (Scale bar =10  $\mu\text{m}$ )



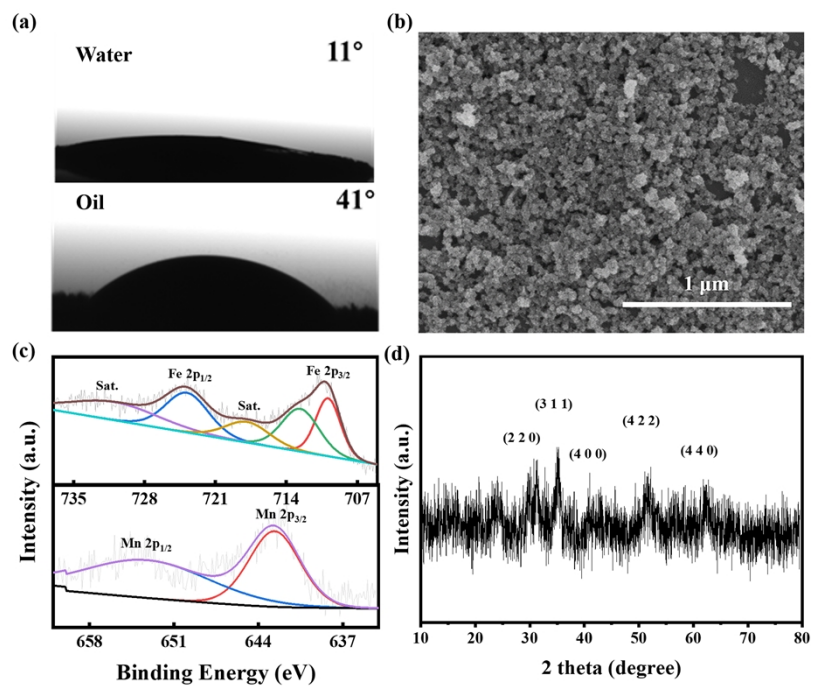

**Fig. S8** Characterization of final recycled MnFe<sub>2</sub>O<sub>4</sub> nanoparticles: CA (a), SEM images (b), XPS (c), and XRD (d).
